# Supplementary material for: Characteristics and quality of clinical practice guidelines addressing acupuncture interventions: a systematic survey of 133 guidelines and 433 acupuncture recommendations
Source: HighWire-hosted journal article supplement (doi:10.1136/bmjopen-2021-058834), 2022-02-01
Supplement: bmjopen-2021-058834supp003_data_supplement.pdf [file bmjopen-2021-058834supp003_data_supplement.pdf]

### Supplemental material 3

Table A. Major drawback of application and editorial independence domain

| Variable                                           | N (%)     |
|----------------------------------------------------|-----------|
| <i>Consider resources utilization</i>              |           |
| Reported                                           | 52 (39.1) |
| Not reported                                       | 81 (60.9) |
| <i>Considered patients' values and preferences</i> |           |
| Explicitly reported with details                   | 14 (10.5) |
| Considered without details                         | 58 (43.6) |
| Not reported                                       | 61 (45.9) |
| <i>Reporting conflicts of interest</i>             |           |
| Reported with details                              | 10 (7.5)  |
| Reported without details                           | 62 (46.6) |
| Not reported                                       | 61 (45.9) |

Table B. The rationale for acupuncture recommendations

| Factors*                         | N (%)              |           |                           | P      |
|----------------------------------|--------------------|-----------|---------------------------|--------|
|                                  | Comprehensive CPGs | T&CM CPGs | Acupuncture-specific CPGs |        |
| Treatment effect                 | 59(52.2)           | 30(45.5)  | 197(77.6)                 |        |
| Certainty of evidence            | 41(36.3)           | 0(0.0)    | 1(0.4)                    |        |
| Patients' values and preferences | 10(8.8)            | 1(1.5)    | 27(10.6)                  | <0.001 |
| Cost                             | 2(1.8)             | 0(0.0)    | 24(9.4)                   |        |
| Feasibility                      | 5(4.4)             | 0(0.0)    | 0(0.0)                    |        |

\* One recommendation can contribute to more than one category.

CPG: clinical practice guidelines, T&CM: traditional and complementary medicine.

Table C. Patient characteristics in acupuncture recommendations

| Factors                            | N (%)              |           |                           | P     |
|------------------------------------|--------------------|-----------|---------------------------|-------|
|                                    | Comprehensive CPGs | T&CM CPGs | Acupuncture-specific CPGs |       |
| <i>The severity of the disease</i> |                    |           |                           |       |
| Reported                           | 5(4.4)             | 0(0.0)    | 11(4.3)                   | 0.274 |
| Not reported                       | 108(95.6)          | 66(100.0) | 243(95.7)                 |       |

**Stage of the disease**

|              |          |          |           |        |
|--------------|----------|----------|-----------|--------|
| Reported     | 17(15.0) | 3(4.5)   | 101(39.8) | <0.001 |
| Not reported | 96(85.0) | 63(95.5) | 153(60.2) |        |

CPG: clinical practice guidelines, T&CM: traditional and complementary medicine.

**Table D. Comparators in acupuncture recommendations**

| Comparators in acupuncture recommendations* | N (%)              |             |                           | P      |
|---------------------------------------------|--------------------|-------------|---------------------------|--------|
|                                             | Comprehensive CPGs | T & CM CPGs | Acupuncture-specific CPGs |        |
| Conventional medicine                       | 5(4.4)             | 8(12.1)     | 32(12.6)                  | <0.001 |
| Traditional Chinese medicine                | 0(0.0)             | 2(3.0)      | 4(1.6)                    |        |
| Non-pharmacological therapy                 | 8(7.1)             | 22(33.3)    | 25(9.8)                   |        |
| No acupuncture                              | 12(10.6)           | 1(1.5)      | 2(0.8)                    |        |
| Not reported                                | 88(77.9)           | 34(51.5)    | 201(79.1)                 |        |

\* One recommendation can contribute to more than one category.

CPG: clinical practice guidelines, T&CM: traditional and complementary medicine.

**Table E. Outcome summarized to inform recommendations**

| Outcome summarized in recommendations * | N (%)              |             |                           | P      |
|-----------------------------------------|--------------------|-------------|---------------------------|--------|
|                                         | Comprehensive CPGs | T & CM CPGs | Acupuncture-specific CPGs |        |
| Symptoms                                | 63(55.8)           | 26(39.4)    | 164(64.6)                 | <0.001 |
| Function                                | 20(17.7)           | 9(13.6)     | 57(22.4)                  |        |
| Surrogate outcomes                      | 6(5.3)             | 0(0.0)      | 6(2.4)                    |        |
| Quality of Life                         | 12(10.6)           | 0(0.0)      | 17(6.7)                   |        |
| Mortality                               | 1(0.9)             | 0(0.0)      | 0(0.0)                    |        |
| Major morbid events                     | 1(0.9)             | 0(0.0)      | 0(0.0)                    |        |
| Not reported                            | 43(38.1)           | 38(57.6)    | 49(19.3)                  |        |

\* One recommendation can contribute to more than one category.

CPG: clinical practice guidelines, T&CM: traditional and complementary medicine.
